# Supplementary material
Source: PubMed Central journal article supplement (PMC5561299)
Supplement: AEM.00995-17_zam999118004s1.pdf [file AEM.00995-17_zam999118004s1.pdf]

## Supplementary Information

### Indole-induced Reversion of Intrinsic Multi-antibiotic Resistance in

### *Lysobacter enzymogenes*

Yong Han,<sup>a, b</sup> Yan Wang,<sup>b, c</sup> Yameng Yu,<sup>c</sup> Haotong Chen,<sup>b</sup> Yuemao Shen,<sup>a</sup> Liangcheng Du<sup>a, b</sup>

**TABLE S1.** Solvent system used for analytic HPLC. Solvent A, acetonitrile containing 0.1% formic acid; Solvent B, water containing 0.1% formic acid; Flow rate, 1 mL/min; Detect wavelength, 280 nm.

| Time (min) | Solvent A (%) | Solvent B (%) |
|------------|---------------|---------------|
| 0          | 40            | 60            |
| 4          | 40            | 60            |
| 17         | 70            | 30            |
| 20         | 70            | 30            |
| 25         | 100           | 0             |
| 28         | 100           | 0             |
| 29         | 40            | 60            |

**FIG S1.**  $^1\text{H-NMR}$  and  $^{13}\text{C-NMR}$  of the compound isolated from the LED209 treated *Lysobacter enzymogenes* OH11. The data are consistent with that of standard indole.

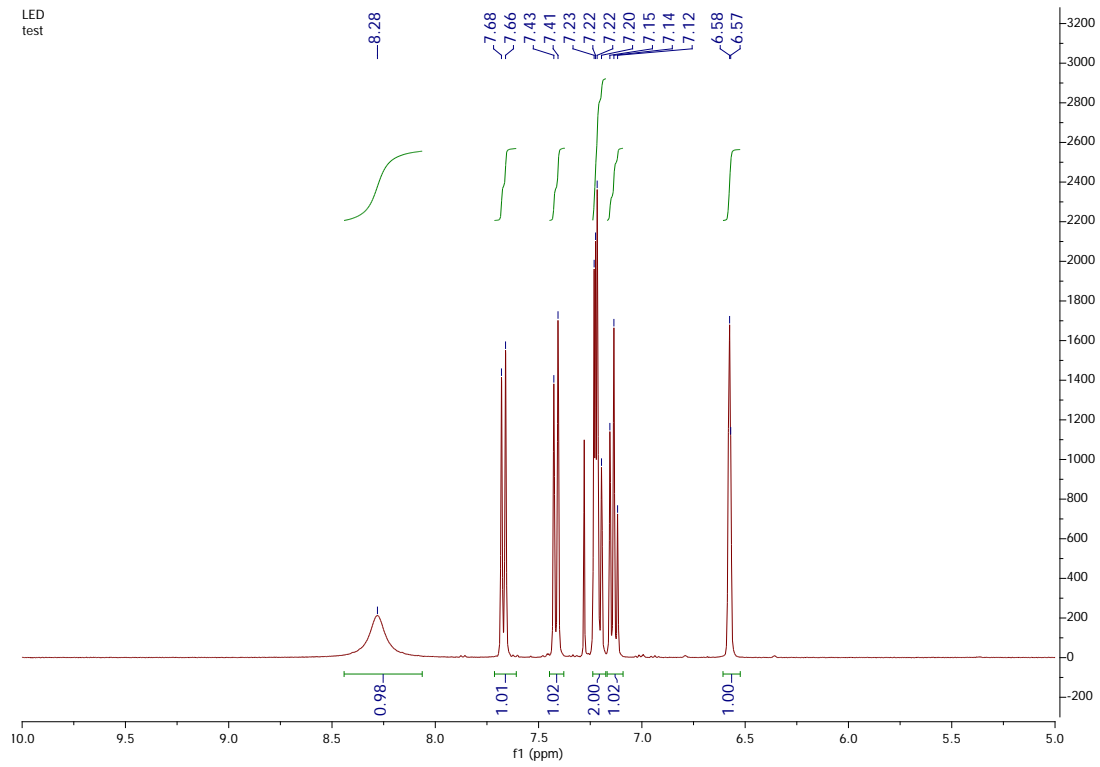

LED  
1000 scans S:N

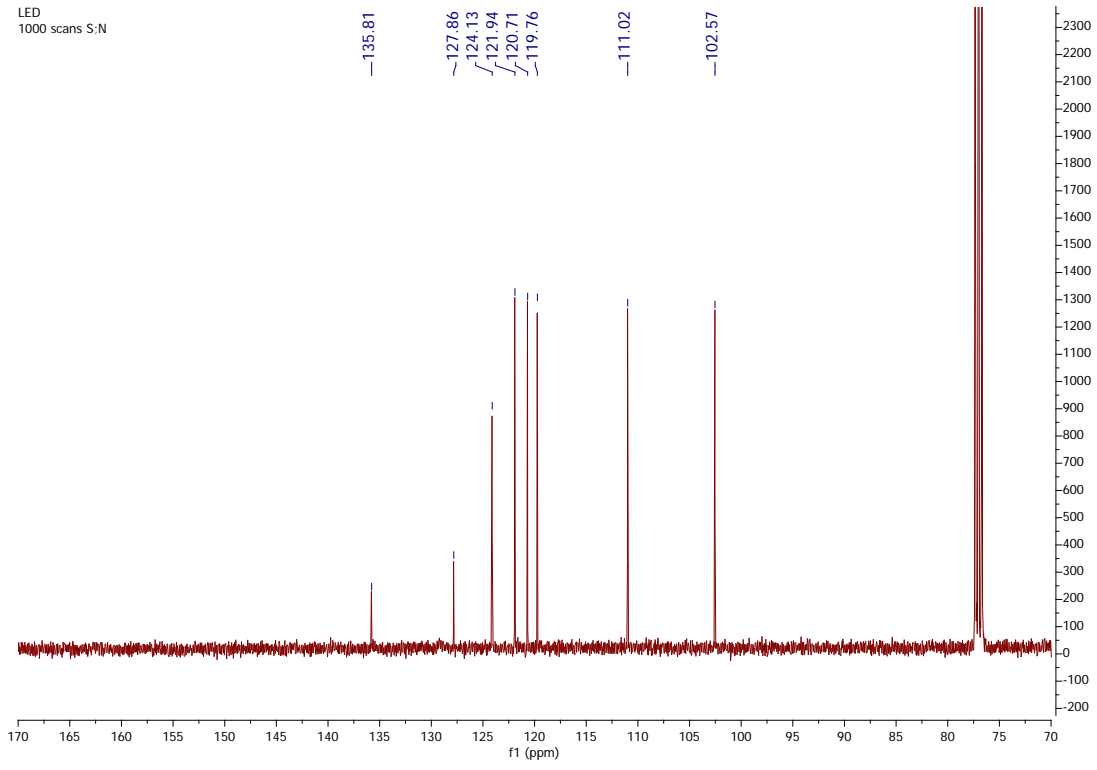

**FIG S2.** Sequence alignment between Le0754/Le0752 in *Lysobacter enzymogenes* OH11 and the two-component regulatory system QseC/QseB from *E. coli*. The original sequences in *E. coli* K12 are QseB (or YgiX, AAC76061.1) and QseC (or YgiY, AAC76062.1),<sup>1</sup> and the sequences in *E. coli* O157:H7 are QseB (AAG58159.1) and QseC (AAG58160.1).<sup>2</sup> The sequence analysis was done by using CLUSTAL O (1.2.1) multiple sequence alignment. Le0754 shows 31.1/43.3% identity/similarity to QseC through the whole sequence, and its histidine phosphorylation site is underlined and in red color. Le0752 has 47.5/62.0% identity/similarity to QseB through the whole sequence, and its aspartate phosphorylation site is underlined and red color. Also red-color highlighted are four conserved QseC residues for generating four single point-mutants, D85V, F126A, F154A, W164E, at the N-terminal ligand-binding domain, but not the C-terminal kinase domain.

### QseC alignment

|        |                                                                                                        |     |
|--------|--------------------------------------------------------------------------------------------------------|-----|
| Le0754 | MSAVDGRDAAAPGEREARWRDRDRERESQSRSGWRERCRQSREFPAGRSLRWKLTWVLFKA                                          | 60  |
| K12    | -----MKFTQRLSLRVRLTLIFLIL                                                                              | 20  |
| O157   | -----MKFTQRLSLRVRLTLIFLIL                                                                              | 20  |
|        | : *      * * *    : * *    : : :                                                                       |     |
| Le0754 | VLLAWFVWLSQCQIWQLGRERT-GML <u>D</u> HSLREIAEQVLGSMP----EGLERLPSRDPRRAT                                 | 115 |
| K12    | ASVTWLLS-SFVAWKQT'TDNVDELFDFTQLMLFAKRL-STLDLNEINAADR-MAQTPNRLK                                         | 77  |
| O157   | ASVTWLLS-SFVAWKQT'TDNVDELFDFTQLMLFAKRL-STLDLNEINAADR-MAQTPNRLK                                         | 77  |
|        | . : * * * : *    * * :    : . .    : * *    . *    : * * * :    : :    : .    : *    : :    * . :    . |     |
| Le0754 | VPVHADQKMS <u>F</u> QVWAHGRNVVYSAAAPLQPLN-PEFKD <u>G</u> FARRVI--DGER <u>W</u> QVYTLTDK                | 172 |
| K12    | HGHVDDDALTFAlFTHDGRMVLNDGDNGEDIPYSYQREGFADGQLVGEDDPWRVWMTSP                                            | 137 |
| O157   | HGHVDDDALTFAlFTHDGRMVLNDGDNGEDIPYSYQREGFADGQLVGDKDQWRVWMTSP                                            | 137 |
|        | * :    : *    : * *    . : *    . .    : :    : * * *    :    : :    * . :    : * .                    |     |
| Le0754 | ARGLVVQVGRTRMAIEELQGWIVGSLAAALILVVFALATWLVIGRSLRPITALRRTLQ                                             | 232 |
| K12    | DGKYRIVVGQEWYREDMALAIVAGQLIPWLVALPIMLIIMMVLLGRELAPLNKLALALR                                            | 197 |
| O157   | DGKYRIVVGQEWYREDMALAIVAGQLIPWLVALPVMLIIMMVLLGRELAPLNKLALALR                                            | 197 |
|        | : * * :    .    :    .    : . * . * * :    : *    : :    : * * * . *    * . :    : * :                 |     |

|        |                                                                   |            |              |     |
|--------|-------------------------------------------------------------------|------------|--------------|-----|
| Le0754 | QRQPLDLTPLPTHPLPSEFHPVVEAFNGQLERVDAAVQH                           | ERRFISDAAH | HELRTPLAVLST | 292 |
| K12    | MRDPDSEKPLNATGVPSEVRPLVESLNQLFARTHAMMVR                           | ERRFTSDAAH | HELRSPLTALKV | 257 |
| O157   | MRDPDSEKPLNATGVPSEVRPLVESLNQLFARTHAMMVR                           | ERRFTSDAAH | HELRSPLTALKV | 257 |
|        | *:* . .* : :***.:*****:* : *.* : :**** *****:***.*..              |            |              |     |
| Le0754 | HAELAL-RATTLEAKNAALQKLNAGVQRSARLSEQLLDLARLDAGEESVRLAPLDLSDLI      |            |              | 351 |
| K12    | QTEVAQLSDDDPQARKKALLQLHSGIDRATRLVDQLLTL SRLDSDLNLQDVAEIPLEDLL     |            |              | 317 |
| O157   | QTEVAQLSDDDPQARKKALLQLHSGIDRATRLVDQLLTL SRLDSDLNLQDVAEIPLEDLL     |            |              | 317 |
|        | :***: :***: ** :*.:***:***:**** *:*:***: : : * : *.*:             |            |              |     |
| Le0754 | VLVIRDFETLARER--RQRISLRAEPTRLLGDVDQLGILLRNLDNAVRHAGADGQVAVS       |            |              | 409 |
| K12    | QSSVMDIYHTAQQAKIDVRLTLNAHSIKRTGQPLLLSLLVRNLLDNAVRYSPQGSVVDVT      |            |              | 377 |
| O157   | QSSVMDIYHTAQQAKIDVRLTLNVQGIKRTGQPLLLSLLVRNLLDNAVRYSPQGSVVDVT      |            |              | 377 |
|        | : * : * : * : * . . . : * : * . : * : * : * : * : * : * : * : * : |            |              |     |
| Le0754 | CSAEAGGAVLRVADNGPGVATDDCERIFDRFYRAPGSPDGGSGIGLSLVARIAQTHGARI      |            |              | 469 |
| K12    | L----NADNFIVRDNGPGVTPEALARIGERFYRPPGQTATGSGGLSIVQRIAKLHGMNV       |            |              | 433 |
| O157   | L----NADNFIVRDNGPGVTPEALARIGERFYRPPGQTATGSGGLSIVQRIAKLHGMNV       |            |              | 433 |
|        | . : * *****: : ** :***** ** . *****:***:***: ** . :               |            |              |     |
| Le0754 | ECGQGLERAGDDPRGPGRGFEVCVRFPPVSP                                   | 500        |              |     |
| K12    | EFGNAEQ-----GGFEAKVSW-----                                        | 449        |              |     |
| O157   | EFGNAEQ-----GGFEAKVSW-----                                        | 449        |              |     |
|        | * * : . : * * * . * :                                             |            |              |     |

## OseB alignment

|        |                                                                          |       |            |     |
|--------|--------------------------------------------------------------------------|-------|------------|-----|
| K12    | MRILLIEDDMLIGDIKTGLSKMGFSVDWFTQGRQGKEALYSAPY                             | DAVIL | DLTLPGMDGR | 60  |
| O157   | MRILLIEDDMLIGDIKTGLSKMGFSVDWFTQGRQGKEALYSAPY                             | DAVIL | DLTLPGMDGR | 60  |
| Le0752 | MNILLVEDDAMLAEAVRTGLGHGWRVDWVADAPLAKTALVDHDF                             | DAVVL | DLGLPGGSGL | 60  |
|        | *.****:*** :*.:.:***.: * : * * . :. * * . :***:*** * * * . *             |       |            |     |
| K12    | DILREWREKQREPVLILTARDALAERVEGLRLGADDYLCKPFALIEVAARLEALMRRTN              |       |            | 120 |
| O157   | DILREWREKQREPVLILTARDALEERVXGLRLGADDYLCKPFALIEVAARLEALMRRTN              |       |            | 120 |
| Le0752 | GVLGALRNRYDATPVLIVTARDKLSERIAGLDAGADDYIVKPFQLDEL CARLRAVMRRSQ            |       |            | 120 |
|        | :* * : : * * * : * * * * * * : * * * * * * * * : * . * * . * : * * * : : |       |            |     |
| K12    | GQASNELRHGNVMLDPGKRIATLAGEPLTLKPKEFALLELLMRNAGRVLSRKLIIEEKLYT            |       |            | 180 |
| O157   | GQASNELRHGNVMLDPGKRIATLAGEPLTLKPKEFALLELLMRNAGRVLPKLIIEEKLYT             |       |            | 180 |
| Le0752 | GRVSPVLSGAVVLDPARRLVTRDGEVVALSGHEFRTLTLLEERQGRVVVTRQLEEAAYG              |       |            | 180 |
|        | * : . * * * * : * : . * * * * : * . : * * * * : * * * : * : * * : *      |       |            |     |

|        |                                           |     |
|--------|-------------------------------------------|-----|
| K12    | WDEEVTSNAVEVHVHHLRRKLGSDFIRTVHGIGYTLGEK-- | 219 |
| O157   | WDEEVTSNAVEVHVHHLRRKLGSDFIRTVHGIGYTLGEK-- | 219 |
| Le0752 | SSGTIESNTIAVYVHQLRRKLGEQLIVTVHGYGYRVGGGPN | 221 |
|        | . : **: : *:**:*****. : * **** ** :*      |     |

**FIG S3.** Quantitative PCR (qPCR) analysis of the expression of *Le-qseC* and *Le-qseB* in the wild type *L. enzymogenes* OH11. Black bars are results for *Le-qseC* expression; grey bars are for *Le-qseB* expression. A and D. wild type untreated; B and E. wild type treated with 200  $\mu$ M indole; C and F. wild type treated with 10 pM LED209.

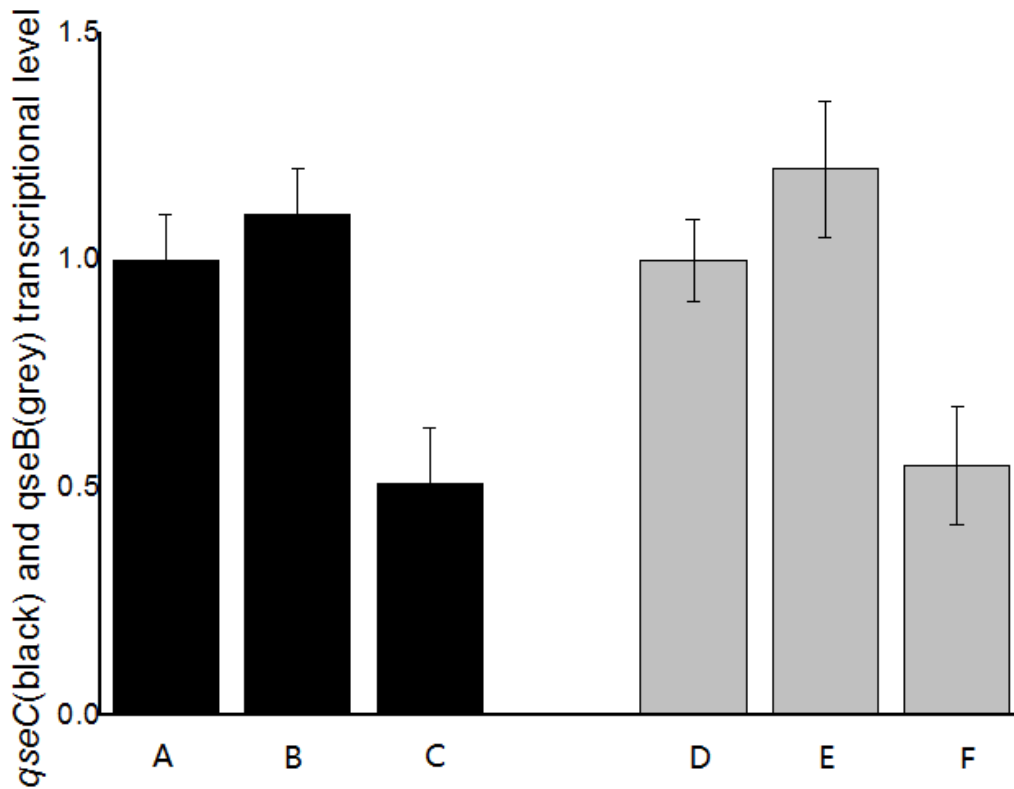



**FIG S4.**  $^1\text{H-NMR}$  of compound **3** in the synthesis of fluorescent indole probe.

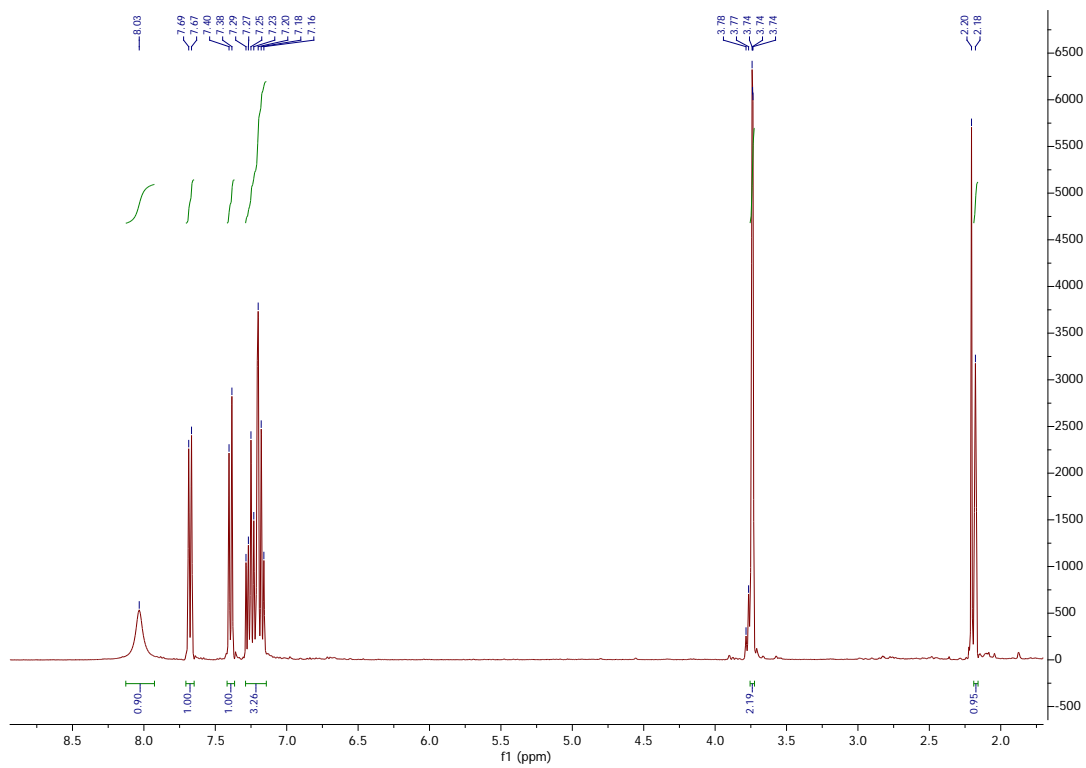

**FIG S5.** MS of compound **1**, the fluorescent indole probe. A. Full Scan; B. MS-MS data; C.

possible structure of the MS-MS fragments.

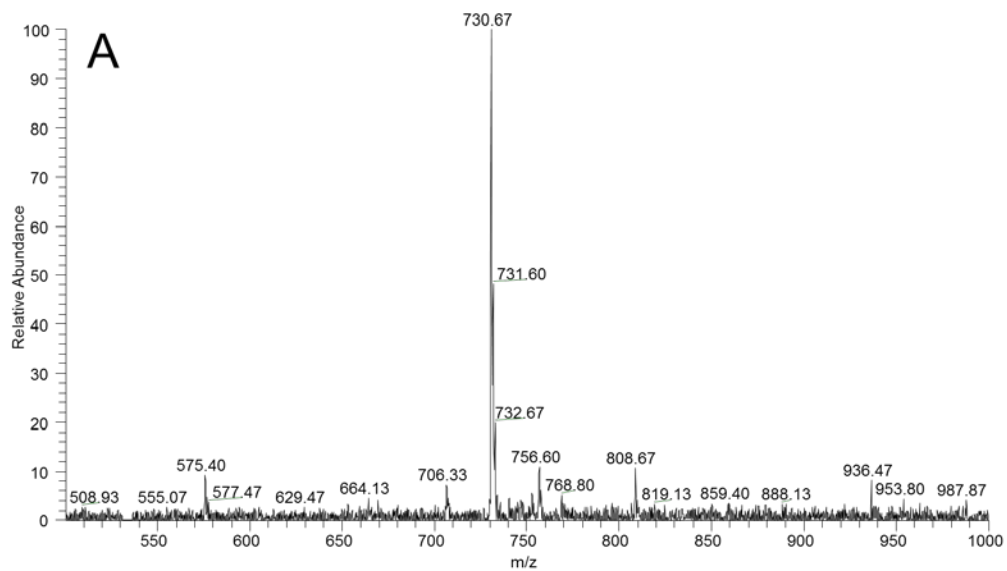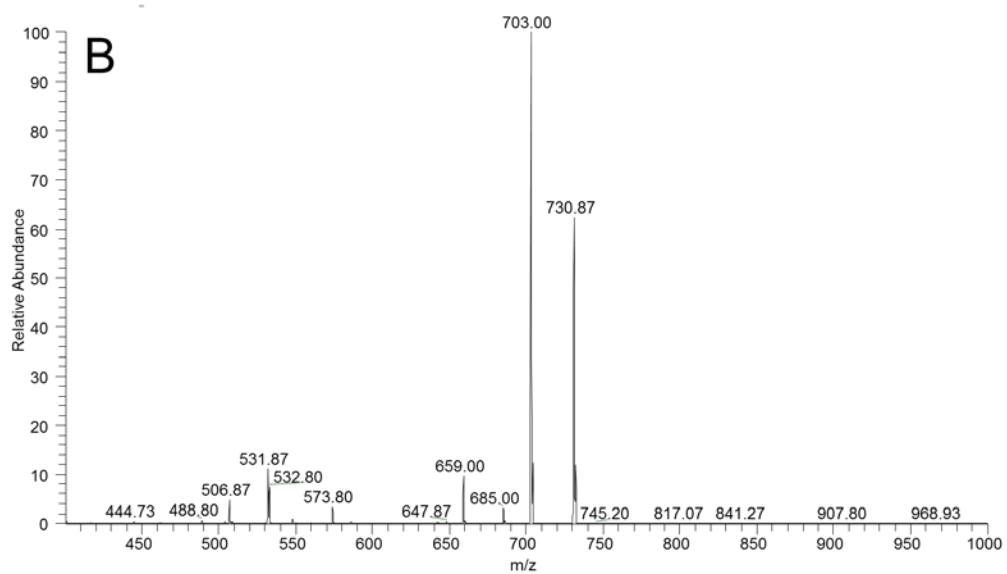

C

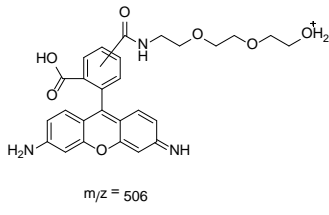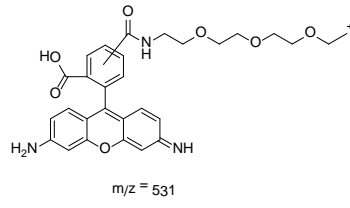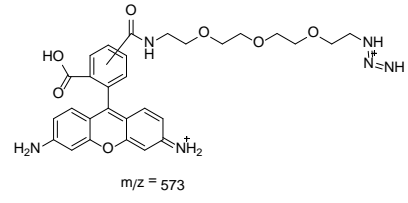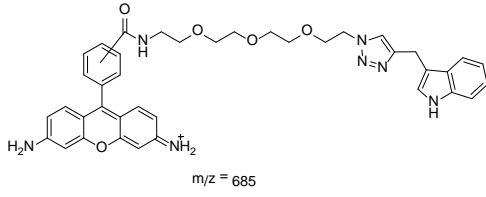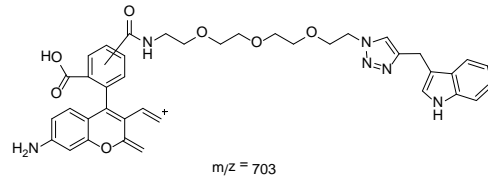

**FIG S6A.** Effect of indole and LED209 on the production of the antifungal HSAF in *L. enzymogenes* OH11. A. treated with 200  $\mu$ M indole; B. treated with 100  $\mu$ M indole; C. treated with 50  $\mu$ M indole; D. treated with 5 pM LED209; E. untreated control. The identity of the peaks: a) HSAF, b) Alteramide A, c) 3-deOH-HSAF, d) 3-deOH-Alteramide A (see Figure S6B for structures).

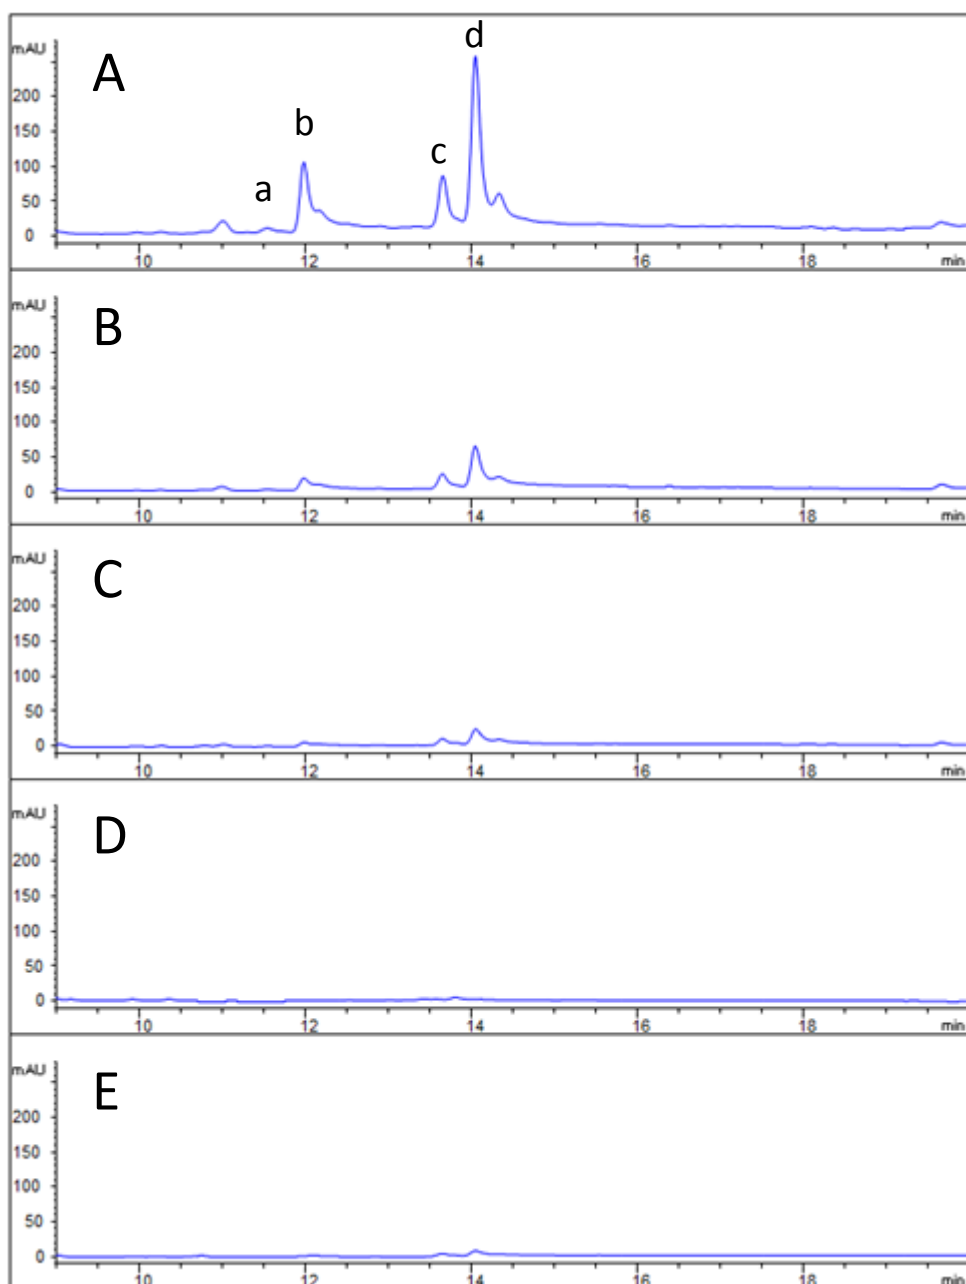

**FIG S6B.** Mass spectra and chemical structure of HSAF, Alteramide A, 3-deOH-HSAF and 3-deOH-Alteramide A.

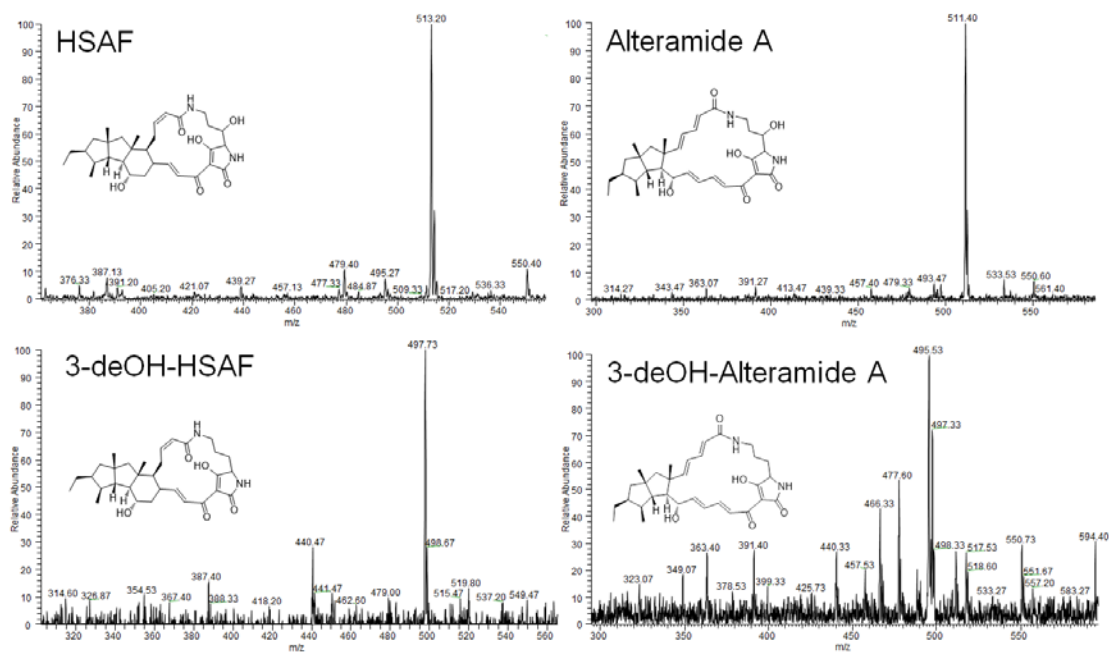

## REFERENCES

1. **Blattner, F.R., Plunkett, G., 3<sup>rd</sup>, Bloch, C.A., Perna, N.T., Burland, V., Riley, M., Collado-Vides, J., Glasner, J.D., Rode, C.K., Mayhew, G.F., Gregor, J., Davis, N.W., Kirkpatrick, H.A., Goeden, M.A., Rose, D.J., Mau, B., and Shao, Y.** (1997) The complete genome sequence of *Escherichia coli* K-12. *Science* **277**: 1453-1462.
2. **Perna, N.T., Plunkett, G., Burland, V., Mau, B., Glasner, J.D., Rose, D.J., Mayhew, G.F., Evans, P.S., Gregor, J., Kirkpatrick, H.A., Posfai, G., Hackett, J., Klink, S., Boutin, A., Shao, Y., Miller, L., Grotbeck, E.J., Davis, N.W., Lim, A., Dimalanta, E.T., Potamouisis, K.D., Apodaca, J., Anantharaman, T.S., Lin, J., Yen, G., Schwartz, D.C., Welch, R.A., and Blattner, F.R.** (2001) Genome sequence of enterohaemorrhagic *Escherichia coli* O157:H7. *Nature* **409**: 529-533.
